# Supplementary material for: Quality Characteristics of Vegan Mayonnaise Produced Using Supercritical Carbon Dioxide-Processed Defatted Soybean Flour
Source: MDPI journal article supplement (doi:10.3390/foods13081170), 2024-04-11
Supplement: s1 [file s1]

Table S1. Proximate composition of control soy flour (CSF), defatted soy flour treated with SC-CO<sub>2</sub> (DSF), and egg yolk (EY).

Table S2. pH of mayonnaises prepared with control soy flour (CSF), defatted soy flour treated with SC-CO<sub>2</sub> (DSF), and egg yolk (EY).

Table S3. Particle size diameter (μm) of mayonnaises prepared with control soy flour (CSF), defatted soy flour treated with SC-CO<sub>2</sub> (DSF), and egg yolk (EY).

Table S4. Particle size analysis of mayonnaise with different emulsifiers at different concentrations.

**Table S1**

| Proximate composition (%) | CSF                     | DSF                     | EY                      |
|---------------------------|-------------------------|-------------------------|-------------------------|
| Moisture                  | 7.41±0.65 <sup>c</sup>  | 3.30±0.08 <sup>a</sup>  | 3.48±0.24 <sup>b</sup>  |
| Ash                       | 5.41±0.29 <sup>b</sup>  | 6.26±0.14 <sup>c</sup>  | 3.94±0.21 <sup>a</sup>  |
| Protein                   | 38.66±0.66 <sup>b</sup> | 48.93±0.82 <sup>c</sup> | 36.20±0.74 <sup>a</sup> |
| Fat                       | 18.95±0.95 <sup>b</sup> | 0.51±0.37 <sup>a</sup>  | 54.27±0.56 <sup>c</sup> |
| Carbohydrate              | 29.50±1.03 <sup>b</sup> | 41.00±0.15 <sup>a</sup> | 2.11±0.64 <sup>c</sup>  |

CSF: control soy flour; DSF: defatted soybean flour treated with SC-CO<sub>2</sub>; EY: egg yolk.

All values are mean ± SD (n=3); Means with different superscripts letters within the same column are significantly different ( $p < 0.05$ ) using Duncan's test.

**Table S2**

| pH         | % Addition of Emulsifier  |                         |                         |                         |                         |
|------------|---------------------------|-------------------------|-------------------------|-------------------------|-------------------------|
|            | 0.5                       | 1                       | 1.5                     | 2                       | 3                       |
| <b>CSF</b> | 3.83±0.01 <sup>bA5)</sup> | 3.99±0.02 <sup>bB</sup> | 4.11±0.01 <sup>bC</sup> | 4.20±0.01 <sup>bD</sup> | 4.34±0.00 <sup>bE</sup> |
| <b>DSF</b> | 3.61±0.02 <sup>aA</sup>   | 3.80±0.01 <sup>aB</sup> | 3.92±0.00 <sup>aC</sup> | 4.03±0.01 <sup>aD</sup> | 4.16±0.02 <sup>aE</sup> |
| <b>EY</b>  | 4.17±0.01 <sup>cA</sup>   | 4.31±0.01 <sup>cB</sup> | 4.42±0.00 <sup>cC</sup> | 4.58±0.01 <sup>cD</sup> | 4.67±0.01 <sup>cE</sup> |

CSF: control soy flour; DSF: defatted soybean flour treated with SC-CO<sub>2</sub>; EY: egg yolk.

All values are mean ± SD (n=3). Different letters (a–e for the samples at different emulsifiers within the same column, A–E for the samples at different additive levels within the same row) indicate significant differences ( $p < 0.05$ ) by Duncan's test.

**Table S3**

| Particle size diameter<br>( $\mu\text{m}$ ) | % addition of emulsifier       |                                |                                |                                |                                |
|---------------------------------------------|--------------------------------|--------------------------------|--------------------------------|--------------------------------|--------------------------------|
|                                             | 0.5                            | 1                              | 1.5                            | 2                              | 3                              |
| <b>CSF</b>                                  | 53.35 $\pm$ 0.12 <sup>cE</sup> | 45.85 $\pm$ 0.25 <sup>cD</sup> | 42.46 $\pm$ 0.30 <sup>cC</sup> | 39.38 $\pm$ 0.32 <sup>cB</sup> | 33.01 $\pm$ 0.22 <sup>cA</sup> |
| <b>DSF</b>                                  | 35.84 $\pm$ 0.1 <sup>bE</sup>  | 32.90 $\pm$ 0.04 <sup>bD</sup> | 28.64 $\pm$ 0.05 <sup>bC</sup> | 24.24 $\pm$ 0.20 <sup>bB</sup> | 12.02 $\pm$ 0.26 <sup>bA</sup> |
| <b>EY</b>                                   | 28.98 $\pm$ 0.03 <sup>aE</sup> | 27.70 $\pm$ 0.12 <sup>aD</sup> | 23.33 $\pm$ 0.21 <sup>aC</sup> | 15.96 $\pm$ 0.08 <sup>aB</sup> | 8.3 $\pm$ 0.16 <sup>aA</sup>   |

CSF: control soy flour; DSF: defatted soy flour treated with SC-CO<sub>2</sub>; EY: egg yolk.

Different letters (a-e for the samples at different emulsifiers within the same column, A-E for the samples at different additive levels within the same row) indicate significant differences ( $p < 0.05$ ) by Duncan's test.

**Table S4.** Particle size analysis of mayonnaise with different emulsifiers at different concentrations.

| <b>d<sub>4,3</sub></b> | <b>Different addition of emulsifier (%)</b> |                          |                          |                          |                          |
|------------------------|---------------------------------------------|--------------------------|--------------------------|--------------------------|--------------------------|
|                        | <b>0.5</b>                                  | <b>1</b>                 | <b>1.5</b>               | <b>2</b>                 | <b>3</b>                 |
| <b>CSF</b>             | 53.35±0.12 <sup>cE1)</sup>                  | 45.85±0.25 <sup>cD</sup> | 42.46±0.30 <sup>cC</sup> | 39.38±0.32 <sup>cB</sup> | 33.01±0.22 <sup>cA</sup> |
| <b>DSF-SC</b>          | 35.84±0.1 <sup>bE</sup>                     | 32.90±0.04 <sup>bD</sup> | 28.64±0.05 <sup>bC</sup> | 24.24±0.20 <sup>bB</sup> | 12.02±0.26 <sup>bA</sup> |
| <b>EY</b>              | 28.98±0.03 <sup>aE</sup>                    | 27.70±0.12 <sup>aD</sup> | 23.33±0.21 <sup>aC</sup> | 15.96±0.08 <sup>aB</sup> | 8.3±0.16 <sup>aA</sup>   |

<sup>1)</sup>Lowercase letters (a-c) indicate significant differences between different emulsifiers within the same column, while uppercase letters (A-E) indicate significant differences between different additive levels within the same row. Different letters denote significant differences among samples ( $p < 0.05$ )
